# Supplementary material
Source: PubMed Central journal article supplement (PMC11268737)
Supplement: NIHMS2006821-supplement-SupplementalAppendix.pdf [file NIHMS2006821-supplement-SupplementalAppendix.pdf]

## APPENDIX

### A DERIVATION OF TEST STATISTIC FOR $K > 2$ GROUPS

Here, we extend our weighted log rank test procedure to compare  $K > 2$  groups. We will assume an incomplete within-cluster group structure, as the complete within-cluster group structure is a special case. Recall that the weighted counting and at risk processes for group  $k$  were defined as

$$\begin{aligned}\hat{N}_k(t) &= \sum_{i=1}^M M \sum_{j=1}^{n_i} \omega_{ik} I[X_{ij} \leq t, \delta_{ij}, G_{ij} = k] \\ \hat{Y}_k(t) &= \sum_{i=1}^M M \sum_{j=1}^{n_i} \omega_{ik} I[X_{ij} \geq t, G_{ij} = k],\end{aligned}$$

where the weights  $\omega_{ik}$  are as defined in the main manuscript. When more than two groups are present, the counting processes  $\hat{N}_k(t)$  and  $\hat{Y}_k(t)$  follow the same formula, with weights defined as

$$\omega_{ik} = \begin{cases} (K_i^c n_{ik})^{-1} & \text{if } n_{ik} > 0 \\ 0 & \text{if } n_{ik} = 0 \end{cases}$$

where  $K_i^c$  is the number of groups having observations in cluster  $i$ , i.e.,  $K_i^c = \sum_{k=1}^K I[n_{ik} > 0]$ . The rationale for this particular weight comes from consideration of the modified WCR procedure discussed in the main manuscript. In cluster  $i$ , a group is selected with equal probability from the groups available in the given cluster, i.e., with probability  $(K_i^c)^{-1}$ . Then, an observation is selected with equal probability from all observations from the selected group, i.e., with probability  $n_{ik}^{-1}$  for each group  $k = 1, \dots, K$ . The two-step WCR procedure then suggests the weight  $(K_i^c n_{ik})^{-1}$  for the weighted counting processes. If group  $k$  is not represented in cluster  $i$ , then, clearly, this group is selected with probability 0, and thus the weight for cluster  $i$  is also 0. The test statistic for group  $k$  is then defined as before

$$\hat{Z}_k(t) = \int_0^t d\hat{N}_k(s) - \frac{\hat{Y}_k(s)}{\hat{Y}(s)} d\hat{N}(s),$$

where  $\hat{N}(t) = \sum_{i=1}^K \hat{N}_i(t)$  and  $\hat{Y}(t) = \sum_{i=1}^K \hat{Y}_i(t)$ . Let  $\hat{\mathbf{Z}}(t) = (\hat{Z}_1(t), \dots, \hat{Z}_K(t))$  be the vector of test statistics. The estimated covariance matrix of  $\hat{\mathbf{Z}}(t)$ , denoted  $\hat{\Sigma}(t)$ , can be estimated via jackknife as described in the main manuscript. The covariance matrix has rank  $K - 1$ , so we construct the test statistic as the quadratic form

$$X^2(t) = \hat{\mathbf{Z}}_{-k}^T(t) \hat{\Sigma}_{-k}(t) \hat{\mathbf{Z}}_{-k}(t),$$

where the subscript  $_{-k}$  denotes removal of the  $k^{th}$  element of  $\hat{\mathbf{Z}}(t)$  and the  $k^{th}$  row and column of  $\hat{\Sigma}(t)$ , where  $k$  can be arbitrarily selected. Under typical regularity conditions, it is expected that  $X^2(t)$  follows the  $\chi_{K-1}^2$  distribution and we reject  $H_0 : S_1(t) = \dots = S_K(t)$  if  $X^2(t) > \chi_{K-1, 1-\alpha}^2$ . This procedure, calculating the quadratic form with the removal of one group, corresponds to the traditional  $K$  sample test for i.i.d. data.<sup>11</sup>
